# Supplementary material for: Proanthocyanidins Ameliorate LPS-Inhibited Osteogenesis of PDLSCs by Restoring Lysine Lactylation
Source: MDPI journal article supplement (doi:10.3390/ijms25052947), 2024-03-03
Supplement: s1 [file s1]

# Proanthocyanidins Ameliorate LPS-Inhibited Osteogenesis of PDLSCs by Restoring Lysine Lactylation

Yaxin Wu <sup>1,2</sup>, Xiangyao Wang <sup>1,2</sup>, Yuxiao Zhang <sup>1,2</sup>, Zhihao Wen <sup>1,2</sup>, Yuanyuan Li <sup>1,2</sup>, Kehan Zhang <sup>1,2</sup>, Nuerlan Gosar <sup>1,2</sup>, Qilin Li <sup>1,2</sup>, Jing Mao <sup>1,2,\*</sup> and Shiqiang Gong <sup>1,2,\*</sup>

## Affiliations

1 Department of Stomatology, Tongji Hospital, Tongji Medical College, Huazhong University of Science and Technology, Wuhan 430030, China

2 School of Stomatology, Tongji Medical College, Huazhong University of Science and Technology, Wuhan 430033, China

## Supplementary materials

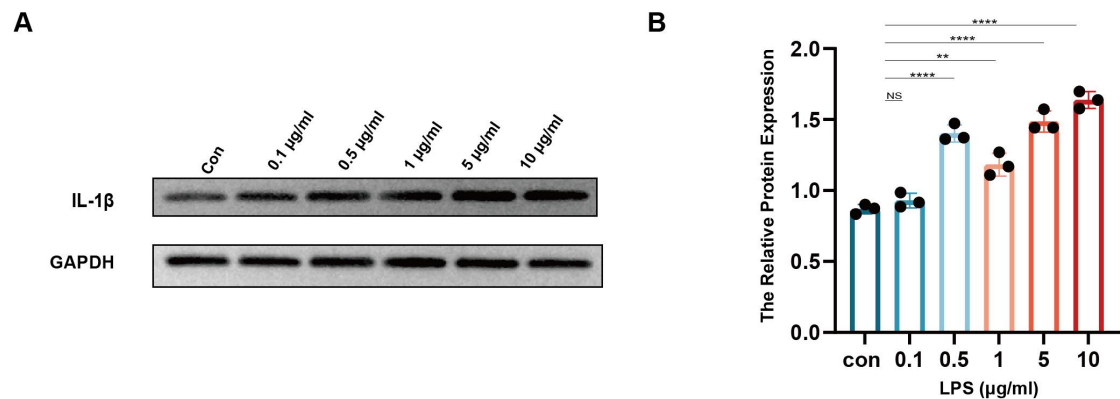

**Figure S1. *P. gingivalis*-derived LPS construct the inflammation model of PDLSCs .**

(A) Western blotting showing protein levels of IL-1β. (B) Quantitative analysis of IL-1β protein levels. \*\*  $p < 0.01$ , \*\*\*\*  $p < 0.0001$ , NS indicates no statistical difference.

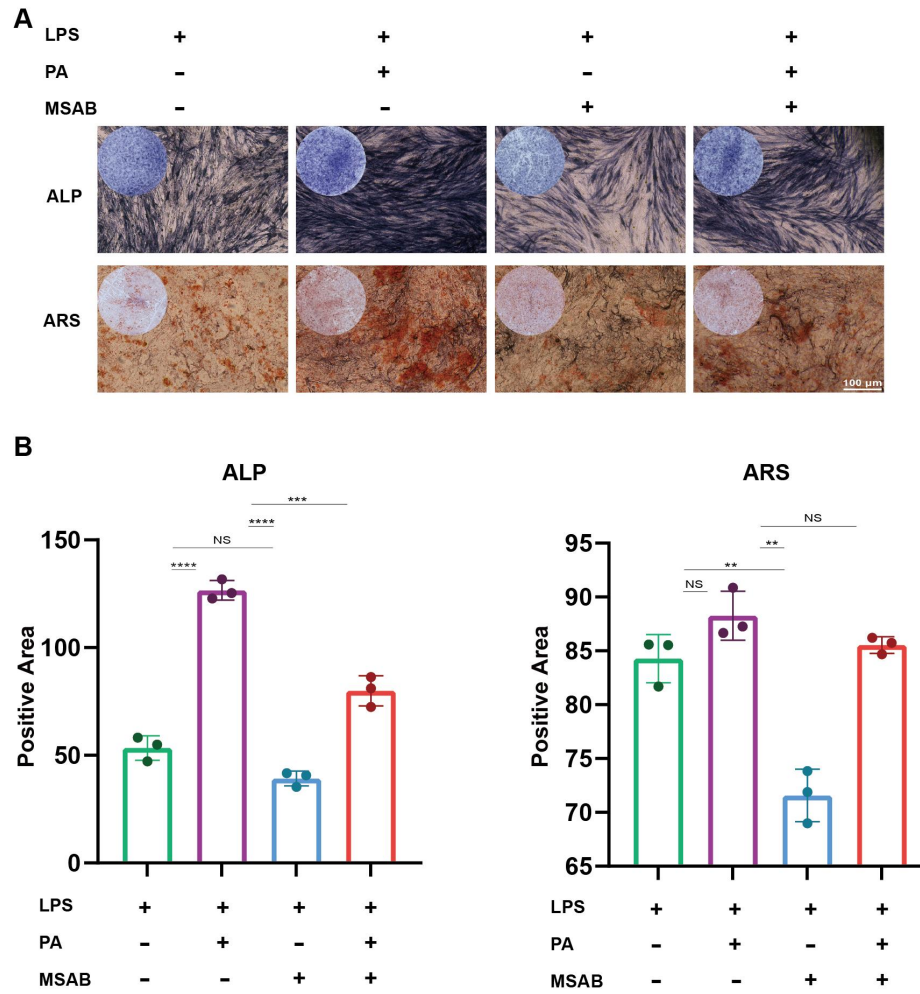

**Figure S2. MSAB attenuate the alkaline phosphatase and calcium nodule-promoting ability of proanthocyanidins on PDLSCs.**

(A) ALP staining at 7 days and ARS staining at 21 days of osteogenic induction in PDLSCs. (B) Quantitative analysis of ALP staining and ARS staining. \*\*  $p < 0.01$ , \*\*\*  $p < 0.001$ , \*\*\*\*  $p < 0.0001$ , NS indicates no statistical difference
